# Supplementary material for: Surface roughness during depositional growth and sublimation of ice crystals
Source: Copernicus journal article supplement (doi:10.5194/acp-18-13687-2018), 2018-09-27
Supplement: Supplementary file 1 [file acp-18-13687-2018-supplement.zip]

Archive with 4 entries (4 files):
- S1-FIG9_20130301_timerseconds.mp4
- Supplement_figures_S3_S4_S5.pdf
- S2-FIG10_20130815_timerseconds.mp4
- acp-18-13687-2018-supplement-title-page.pdf
