# Supplementary material for: Surface roughness during depositional growth and sublimation of ice crystals
Source: Copernicus journal article supplement (doi:10.5194/acp-18-13687-2018), 2018-09-27
Supplement: Supplementary file 1 [file acp-18-13687-2018-supplement.zip › acp-18-13687-2018-supplement-title-page.pdf]

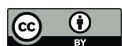

*Supplement of*

## **Surface roughness during depositional growth and sublimation of ice crystals**

**Jens Voigtländer et al.**

*Correspondence to:* Zbigniew Ulanowski (z.ulanowski@herts.ac.uk)

- [acp-18-13687-2018-supplement-title-page.pdf](#)
- [S1-FIG9\\_20130301\\_timerseconds.mp4](#)
- [S2-FIG10\\_20130815\\_timerseconds.mp4](#)
- [Supplement\\_figures\\_S3\\_S4\\_S5.pdf](#)

The copyright of individual parts of the supplement might differ from the CC BY 4.0 License.
